# Supplementary material
Source: Springer Nature journal article supplement (https://www.springermedizin.de/resource/supplementary/13014_2011_435_MOESM1_ESM.pdf/9633428)

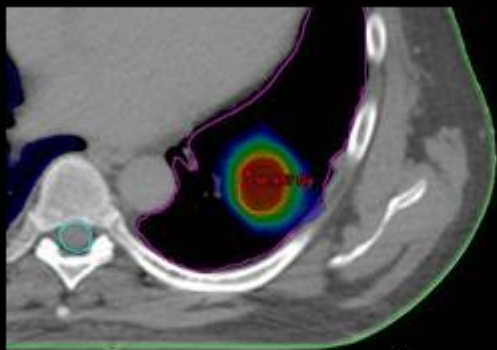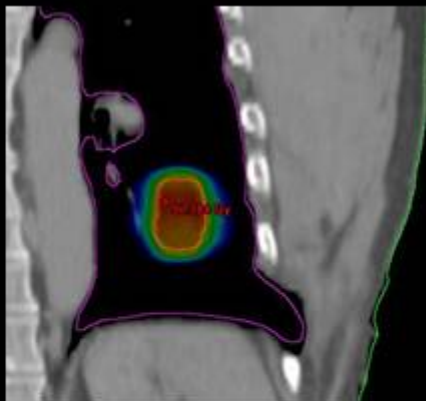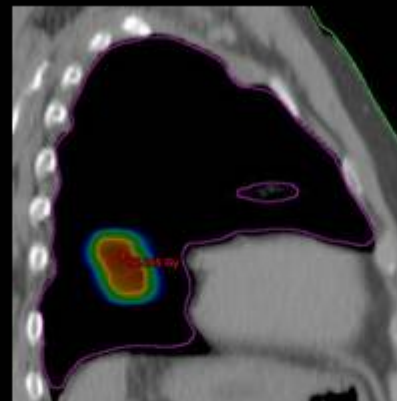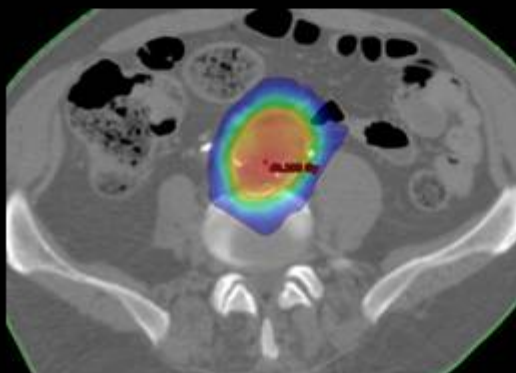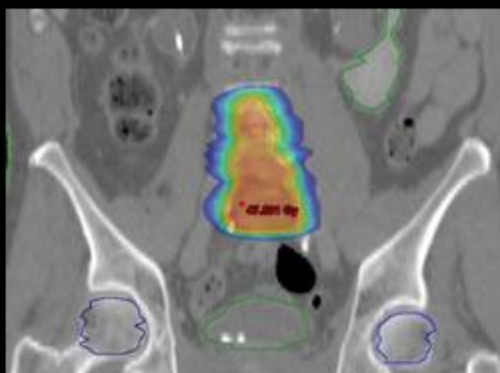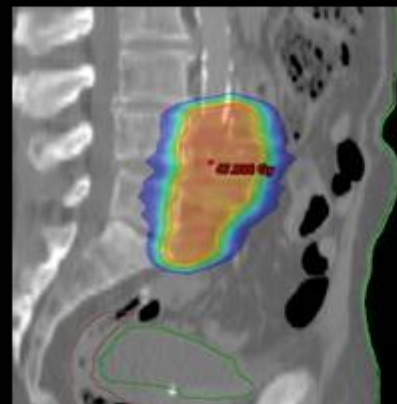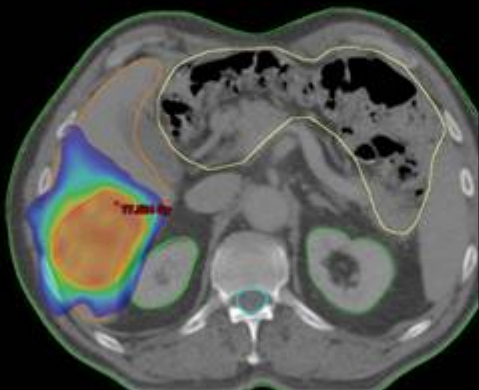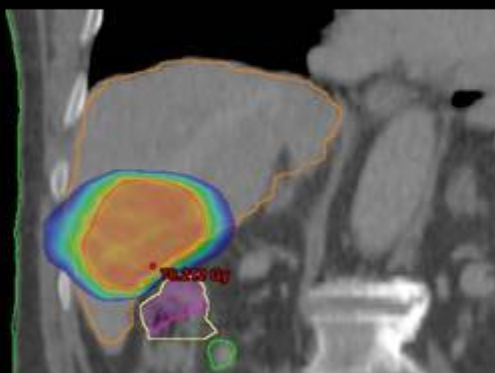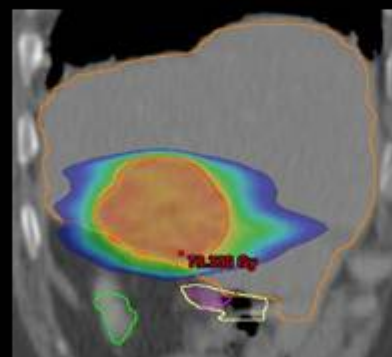

Supplement: MOESM1 [file 9633428]
